# Supplementary material for: Tsc1 Regulates the Proliferation Capacity of Bone-Marrow Derived Mesenchymal Stem Cells
Source: MDPI journal article supplement (doi:10.3390/cells9092072), 2020-09-10
Supplement: s1 [file s1]

## Supplementary figure S1

to manuscript “*Tsc1* regulates the proliferation capacity of bone-marrow derived mesenchymal stem cells” by Maria V. Guijarro, Laura S. Danielson, Marta Cañamero, Akbar Nawab, Carolina Abraham, Eva Hernando and Glyn D. Palmer.

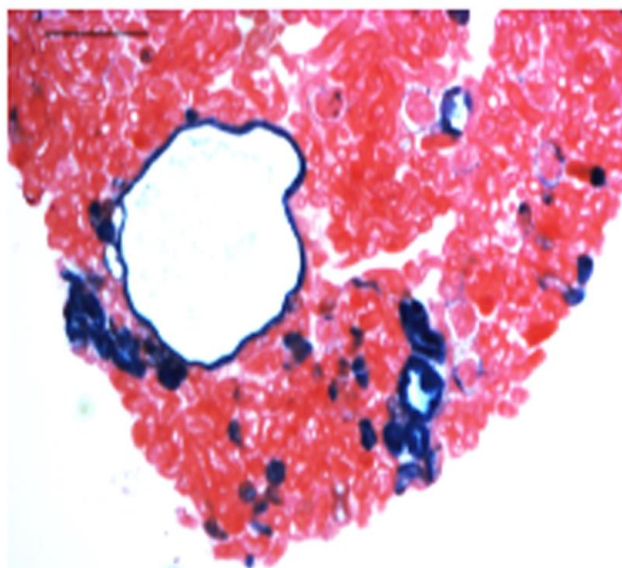

**Figure S1.** Specificity of *Tagln*-mediated recombination in LacZ reporter mice. Representative image of  $\beta$ -gal staining of a kidney recovered from 28 day old *Tagln*-Cre-lacZ mice to determine tissue specificity of *Tagln*-mediated recombination.  $\beta$ -galactosidase staining was performed on whole mount kidneys following fixation and sections were counterstained with eosin. Positively stained areas were confined to smooth muscle-lined vessel structures and lining cells of cystic lesions. Scale Bar: 250  $\mu$ m.

## Supplementary figure S2

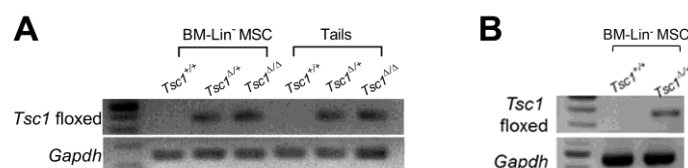

**Figure S2.** *Tsc1* is inactivated in BM-MSCs following *Tagln*-mediated recombination. BM lin<sup>+</sup> cells were harvested from control and *Tsc1* mutant mice and plated to generate adherent MSC cultures of each genotype. Recombination of *Tsc1* alleles was confirmed by PCR of extracted genomic DNA using primers specific for *Tsc1* floxed loci. **(A)** MSCs from 28 day old mice. Tail biopsy tissue was used as a positive control. **(B)** MSCs from a separate aged, 1.5 yr old cohort. Note that only heterozygous mice *Tsc1*<sup>+/+</sup> were used for aging studies as total loss of *Tsc1* (*Tsc1*<sup>Δ/Δ</sup>) induced premature lethality.
